# Supplementary material for: Morphometric analysis of a triple negative breast cancer cell line in hydrogel and monolayer culture environments
Source: PeerJ. 2018 Feb 16;6:e4340. doi: 10.7717/peerj.4340 (PMC5817938; doi:10.7717/peerj.4340)
Supplement: Supplemental Information 1 — Counts for the number of mitochondria, autophagic vacuoles and intercellular junctions were determined from TEM images of HCC70 cells grown in monolayer and hydrogel cultures. The data are shown as number of structures/100 µm2 of tissue area. The statistical analysis was conducted using ANOVA test. [file peerj-06-4340-s001.xlsx]

## Sheet: Data
The number of mitochondria, autophagic vacuoles and intercellular junctions present in the TEM images of monolayer and hydrogel cultures were counted. The data were represented as number of structures/100 μm2 of tissue area. The statistical analysis was conducted using ANOVA test.
Counts obtained from Monolayer Cultures
Experiment	Mitochondria	Autophagic Vacuoles	Junctions	Tissue Area(μm2)	# mito/Tissue area	# AutoVac/Tissue area	# Junctions/Tissue area	# mito/100 um2 area	# AutoVac/100 um2 area	# Junctions/100 um2 area
Exp 1 - MONO1	5	5	4	119.854	0.0417	0.0417	0.0334	4.17	4.17	3.34
	4	6	2	130.181	0.0307	0.0461	0.0154	3.07	4.61	1.54
	5	8	13	133.402	0.0375	0.06	0.0974	3.75	6	9.74
	15	7	9	133.402	0.1124	0.0525	0.0675	11.24	5.25	6.75
	5	5	4	133.402	0.0375	0.0375	0.03	3.75	3.75	3
	8	6	6	133.402	0.06	0.045	0.045	6	4.5	4.5
			Average	130.607	0.0533	0.0471333	0.0481167	5.33	4.71333	4.81167
Exp 1 - MONO2	5	2	5	120.823	0.0414	0.0166	0.0414	4.14	1.66	4.14
	3	1	13	129.429	0.0232	0.0077	0.1004	2.32	0.77	10.04
	0	6	3	133.402	0	0.045	0.0225	0	4.5	2.25
	7	1	4	129.877	0.0539	0.0077	0.0308	5.39	0.77	3.08
	9	3	11	133.402	0.0675	0.0225	0.0825	6.75	2.25	8.25
	8	1	4	133.402	0.06	0.0075	0.03	6	0.75	3
			Average	130.056	0.041	0.0178333	0.0512667	4.1	1.78333	5.12667
Exp 2 - MONO1	8	4	1	133.402	0.06	0.03	0.0075	6	3	0.75
	9	3	13	133.402	0.0675	0.0225	0.0974	6.75	2.25	9.74
	0	6	3	115.595	0	0.0519	0.026	0	5.19	2.6
	11	4	9	133.402	0.0825	0.03	0.0675	8.25	3	6.75
	5	4	6	121.843	0.041	0.0328	0.0492	4.1	3.28	4.92
	9	0	4	133.402	0.0675	0	0.03	6.75	0	3
			Average	128.508	0.0530833	0.0278667	0.0462667	5.30833	2.78667	4.62667
Exp 2 - MONO2	2	9	6	133.402	0.015	0.0675	0.045	1.5	6.75	4.5
	1	2	3	133.402	0.0075	0.015	0.0225	0.75	1.5	2.25
	1	5	6	133.402	0.0075	0.0375	0.045	0.75	3.75	4.5
	9	2	1	126.859	0.0709	0.0158	0.0079	7.09	1.58	0.79
	0	6	1	128.271	0	0.0468	0.0078	0	4.68	0.78
	12	5	7	133.402	0.09	0.0375	0.0525	9	3.75	5.25
			Average	131.456	0.0318167	0.0366833	0.0301167	3.18167	3.66833	3.01167
Counts obtained from Hydrogel Cultures
Experiment	Mitochondria	Autophagic Vacuoles	Junctions	Tissue Area(μm2)	# mito/Tissue area	# AutoVac/Tissue area	# Junctions/Tissue area	# mito/100 um2 area	# AutoVac/100 um2 area	# Junctions/100 um2 area
Exp 1 - 3D1	19	5	6	133.402	0.1427	0.0375	0.045	14.27	3.75	4.5
	15	5	10	118.9	0.1262	0.0421	0.0841	12.62	4.21	8.41
	26	10	14	133.402	0.1949	0.075	0.1049	19.49	7.5	10.49
	7	8	8	133.402	0.0525	0.06	0.06	5.25	6	6
	9	7	14	133.402	0.0675	0.0525	0.1049	6.75	5.25	10.49
	12	12	5	133.402	0.09	0.09	0.0375	9	9	3.75
			Average	130.985	0.1123	0.0595167	0.0727333	11.23	5.95167	7.27333
Exp 1 - 3D2	17	3	12	133.402	0.1274	0.0225	0.09	12.74	2.25	9
	6	15	8	133.402	0.045	0.1124	0.06	4.5	11.24	6
	18	11	9	133.402	0.1349	0.0825	0.0675	13.49	8.25	6.75
	11	15	10	133.402	0.0825	0.1124	0.075	8.25	11.24	7.5
	8	9	5	133.402	0.06	0.0675	0.0375	6	6.75	3.75
	20	7	17	133.402	0.1499	0.0525	0.1274	14.99	5.25	12.74
			Average	133.402	0.09995	0.0749667	0.0762333	9.995	7.49667	7.62333
Exp 2 - 3D1	6	17	2	133.402	0.045	0.1274	0.015	4.5	12.74	1.5
	18	9	14	133.402	0.1349	0.0675	0.1049	13.49	6.75	10.49
	15	10	6	133.155	0.1127	0.075	0.0451	11.27	7.5	4.51
	16	14	13	133.402	0.1199	0.1049	0.0974	11.99	10.49	9.74
	7	8	16	133.402	0.0525	0.06	0.1199	5.25	6	11.99
	18	12	20	133.402	0.1349	0.09	0.1499	13.49	9	14.99
			Average	133.361	0.0999833	0.0874667	0.0887	9.99833	8.74667	8.87
Exp 2 - 3D2	10	9	11	126.544	0.079	0.0711	0.0869	7.9	7.11	8.69
	12	8	13	133.402	0.09	0.06	0.0974	9	6	9.74
	7	9	17	133.402	0.0525	0.0675	0.1274	5.25	6.75	12.74
	20	5	2	116.594	0.1715	0.0429	0.0172	17.15	4.29	1.72
	16	9	13	133.402	0.1199	0.0675	0.0974	11.99	6.75	9.74
	6	5	9	133.402	0.045	0.0375	0.0675	4.5	3.75	6.75
			Average	129.458	0.0929833	0.05775	0.0823	9.29833	5.775	8.23

## Sheet: Analysis Area
Analysis Area	Monolayer	Monolayer	Monolayer	Monolayer	Hydrogel	Hydrogel	Hydrogel	Hydrogel		Average	Monolayer	Hydrogel
	119.854	120.823	133.402	133.402	133.402	133.402	133.402	126.544			128.51	129.46
	130.181	129.429	133.402	133.402	118.9	133.402	133.402	133.402			130.06	130.99
	133.402	133.402	115.595	133.402	133.402	133.402	133.155	133.402			130.61	133.36
	133.402	129.877	133.402	126.859	133.402	133.402	133.402	116.594			131.46	133.4
	133.402	133.402	121.843	128.271	133.402	133.402	133.402	133.402
	133.402	133.402	133.402	133.402	133.402	133.402	133.402	133.402
	Analysis of Variance (One-Way)										Analysis of Variance (One-Way)
	Summary										Summary
	Groups	Sample size	Sum	Mean	Variance						Groups	Sample size	Sum	Mean	Variance	Std Dev
	Monolayer	6	783.643	130.607	29.4113						Monolayer	4	520.627	130.157	1.54043	1.24114
	Monolayer	6	780.335	130.056	23.8521						Hydrogel	4	527.206	131.801	3.7177	1.92813
	Monolayer	6	771.046	128.508	61.3946
	Monolayer	6	788.738	131.456	9.28486						ANOVA
	Hydrogel	6	785.91	130.985	35.0513						Source of Variation	SS	df	MS	F	p-level	F crit
	Hydrogel	6	800.412	133.402	0						Between Groups	5.40958	1	5.40958	2.05761	0.20145	5.98738
	Hydrogel	6	800.165	133.361	0.01017						Within Groups	15.7744	6	2.62906
	Hydrogel	6	776.746	129.458	47.2389
											Total	21.184	7
	ANOVA
	Source of Variation	SS	df	MS	F	p-level	F crit
	Between Groups	127.106	7	18.158	0.70434	0.66826	2.24902
	Within Groups	1031.22	40	25.7804
	Total	1158.32	47
	Groups	Average tissue area sampled	SD		Scale bars = SD
	Monolayer	130.16	1.24
	Hydrogel	131.8	1.93

## Sheet: Mitochondria
Mitochondria		Monolayer	Monolayer	Monolayer	Monolayer	Hydrogel	Hydrogel	Hydrogel	Hydrogel		Average	Monolayer	Hydrogel
		4.17	4.14	6	1.5	14.27	12.74	4.5	7.9			5.33	11.23
		3.07	2.32	6.75	0.75	12.62	4.5	13.49	9			4.1	10
		3.75	0	0	0.75	19.49	13.49	11.27	5.25			5.31	10
		11.24	5.39	8.25	7.09	5.25	8.25	11.99	17.15			3.18	9.3
		3.75	6.75	4.1	0	6.75	6	5.25	11.99
		6	6	6.75	9	9	14.99	13.49	4.5
		Anova: Single Factor										Anova: Single Factor
		SUMMARY										SUMMARY
		Groups	Count	Sum	Average	Variance						Groups	Count	Sum	Average	Variance	Std Dev
		Monolayer	6	31.98	5.33	9.3646						Monolayer	4	17.92	4.48	1.07957	1.04016
		Monolayer	6	24.6	4.1	6.45532						Hydrogel	4	40.5217	10.1304	0.645743	0.802636
		Monolayer	6	31.85	5.30833	8.58542
		Monolayer	6	19.09	3.18167	14.781
		Hydrogel	6	67.38	11.23	28.041						ANOVA
		Hydrogel	6	59.97	9.995	18.78						Source of Variation	SS	df	MS	F	P-value	F crit
		Hydrogel	6	59.99	9.99833	16.5491						Between Groups	63.8544	1	63.8544	74.0207	0.000135613	5.98738
		Hydrogel	6	55.79	9.29833	22.0702						Within Groups	5.17594	6	0.862656
												Total	69.0304	7
		ANOVA
		Source of Variation	SS	df	MS	F	P-value	F crit
		Between Groups	414.182	7	59.1689	3.79815	0.00299678	2.24902
		Within Groups	623.134	40	15.5783
		Total	1037.32	47
		Groups	Average Number of Mitochondria per 100µm2 Tissue Area	SD		Scale bars = SD
		Monolayer	4.48	1.04
		Hydrogel	10.13	0.8

## Sheet: Autophagic Vacuoles
Autophagic Vacuoles		Monolayer	Monolayer	Monolayer	Monolayer	Hydrogel	Hydrogel	Hydrogel	Hydrogel		Average	Monolayer	Hydrogel
		4.17	1.66	3	6.75	3.75	2.25	12.74	7.11			4.71	5.95
		4.61	0.77	2.25	1.5	4.21	11.24	6.75	6			1.78	7.5
		6	4.5	5.19	3.75	7.5	8.25	7.5	6.75			2.79	8.75
		5.25	0.77	3	1.58	6	11.24	10.49	4.29			3.67	5.78
		3.75	2.25	3.28	4.68	5.25	6.75	6	6.75
		4.5	0.75	0	3.75	9	5.25	9	3.75
		Analysis of Variance (One-Way)										Analysis of Variance (One-Way)
		Summary										Summary
		Groups	Sample size	Sum	Mean	Variance						Groups	Sample size	Sum	Mean	Variance	Std Dev
		Monolayer	6	28.28	4.71333	0.64459						Monolayer	4	12.95	3.2375	1.55996	1.24898
		Monolayer	6	10.7	1.78333	2.14695						Hydrogel	4	27.98	6.995	1.96777	1.40277
		Monolayer	6	16.72	2.78667	2.83279
		Monolayer	6	22.01	3.66833	3.91926						ANOVA
		Hydrogel	6	35.71	5.95167	4.01302						Source of Variation	SS	df	MS	F	p-level	F crit
		Hydrogel	6	44.98	7.49667	12.345						Between Groups	28.2376	1	28.2376	16.009	0.00711	5.98738
		Hydrogel	6	52.48	8.74667	6.42703						Within Groups	10.5832	6	1.76386
		Hydrogel	6	34.65	5.775	2.00799
												Total	38.8208	7
		ANOVA
		Source of Variation	SS	df	MS	F	p-level	F crit
		Between Groups	232.634	7	33.2334	7.74295	6.60582e-06	2.24902
		Within Groups	171.683	40	4.29208
		Total	404.317	47
		Group	Average	SD		Scale bars = SD
		Monolayer	3.24	1.25
		Hydrogel	7	1.4

## Sheet: Intercellular Junctions
Intercellular Junctions		Monolayer	Monolayer	Monolayer	Monolayer	Hydrogel	Hydrogel	Hydrogel	Hydrogel		Average	Monolayer	Hydrogel
		3.34	4.14	0.75	4.5	4.5	9	1.5	8.69			4.81	7.27
		1.54	10.04	9.74	2.25	8.41	6	10.49	9.74			5.13	7.62
		9.74	2.25	2.6	4.5	10.49	6.75	4.51	12.74			4.63	8.87
		6.75	3.08	6.75	0.79	6	7.5	9.74	1.72			3.01	8.23
		3	8.25	4.92	0.78	10.49	3.75	11.99	9.74
		4.5	3	3	5.25	3.75	12.74	14.99	6.75
		Analysis of Variance (One-Way)										Analysis of Variance (One-Way)
		Summary										Summary
		Groups	Sample size	Sum	Mean	Variance						Groups	Sample size	Sum	Mean	Variance	Std Dev
		Monolayer	6	28.87	4.81167	8.8589						Monolayer	4	17.58	4.395	0.8953	0.946203
		Monolayer	6	30.76	5.12667	10.3713						Hydrogel	4	31.99	7.9975	0.49569	0.704054
		Monolayer	6	27.76	4.62667	10.5046
		Monolayer	6	18.07	3.01167	3.98734						ANOVA
		Hydrogel	6	43.64	7.27333	8.74251						Source of Variation	SS	df	MS	F	p-level	F crit
		Hydrogel	6	45.74	7.62333	9.29827						Between Groups	25.956	1	25.956	37.3202	0.00088	5.98738
		Hydrogel	6	53.22	8.87	24.7793						Within Groups	4.17298	6	0.6955
		Hydrogel	6	49.38	8.23	13.9365
												Total	30.129	7
		ANOVA
		Source of Variation	SS	df	MS	F	p-level	F crit
		Between Groups	180.888	7	25.8411	2.28484	0.04679	2.24902
		Within Groups	452.393	40	11.3098
		Total	633.281	47
		Group	Average	SD		Scale bars = SD
		Monolayer	4.395	0.95
		Hydrogel	7.9975	0.7
